# Supplementary material
Source: PubMed Central journal article supplement (PMC3196809)
Supplement: NIHMS317233-supplement-supplement_1.pdf [file NIHMS317233-supplement-supplement_1.pdf]

Type of file: figure

Label: 6

Filename: figure\_6.tif

**A**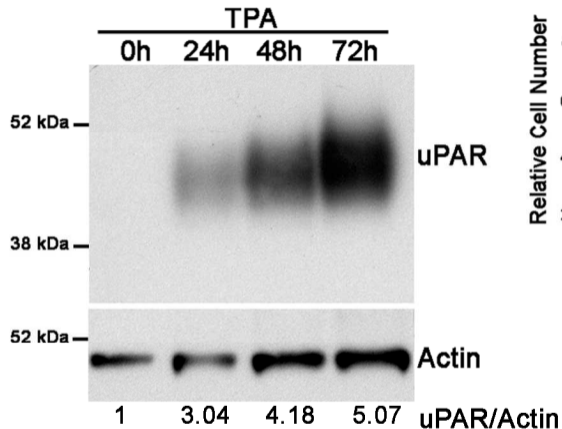**B**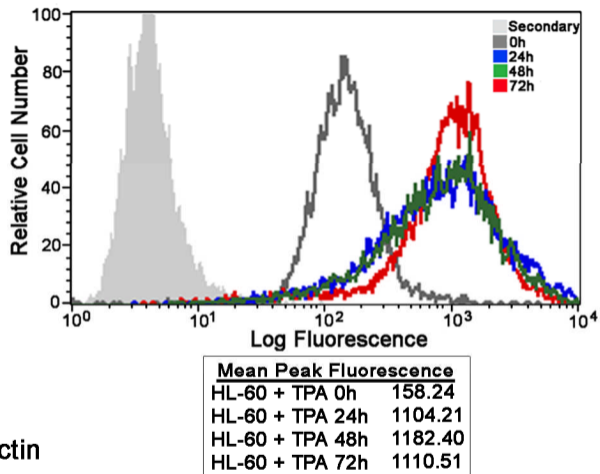

**Supplementary Figure 1**

Type of file: figure

Label: 7

Filename: figure\_7.tif

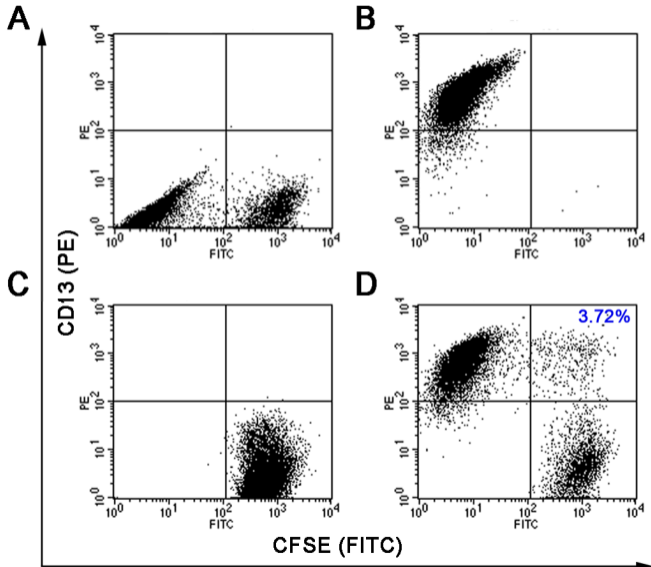

Supplementary Figure 2
